# Supplementary material for: Enhanced photocatalytic degradation activity for tetracycline under visible light irradiation of Ag/Bi3.84W0.16O6.24nanooctahedrons
Source: Royal Society of Chemistry journal article supplement (doi:10.1039/c4ce02376e), 2015-01-01
Supplement: c4ce02376e1.pdf [file c4ce02376e1.pdf]

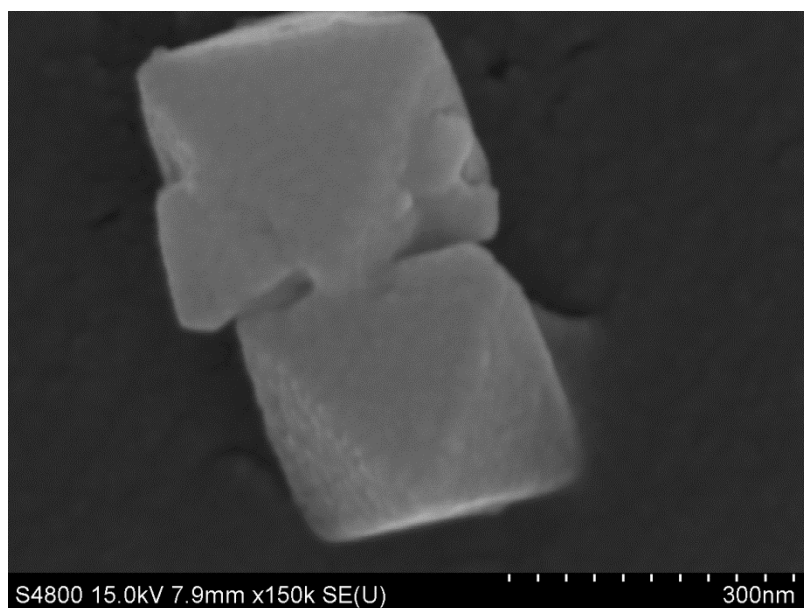

Figure 1 SEM image of  $\text{Ag/Bi}_{3.84}\text{W}_{0.16}\text{O}_{6.24}$  nanooctahedrons after 3 photocatalytic cycles

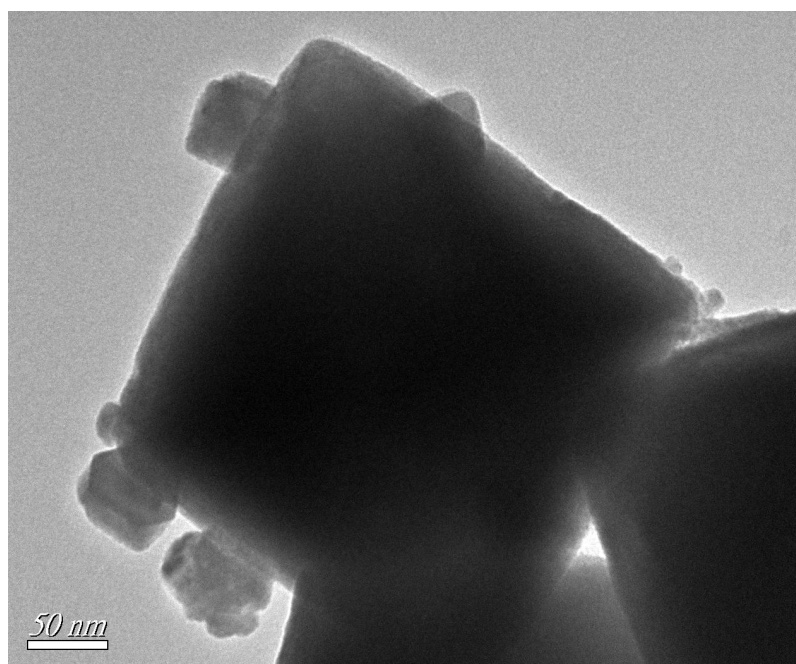

Figure 2 TEM image of  $\text{Ag/Bi}_{3.84}\text{W}_{0.16}\text{O}_{6.24}$  nanooctahedrons after 3 photocatalytic cycles

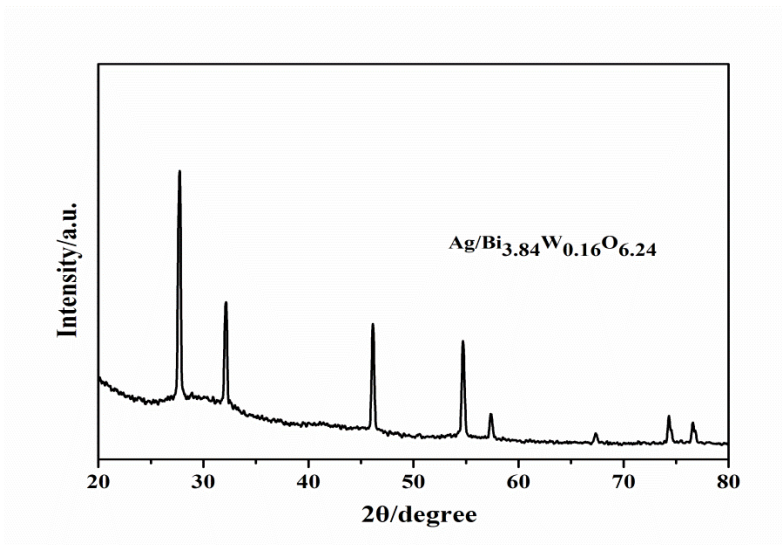

Figure 3 XRD pattern of Ag/Bi<sub>3.84</sub>W<sub>0.16</sub>O<sub>6.24</sub> nanooctahedrons after 3 photocatalytic cycles
